# Supplementary material for: Borylated perylenediimide: self-assembly, photophysics and sensing application
Source: Royal Society of Chemistry journal article supplement (doi:10.1039/c8dt04005b), 2019-01-01
Supplement: c8dt04005b1.pdf [file c8dt04005b1.pdf]

# **Borylated Perylenediimide: Self-assembly, Photophysics and Sensing Application**

Pagidi Sudhakar, Kalluvettukuzhy K. Neena and Pakkirisamy Thilagar\*

Department of Inorganic and Physical Chemistry, Indian Institute of Science, Bangalore, 560012, India

Email: [thilagar@iisc.ac.in](mailto:thilagar@iisc.ac.in)

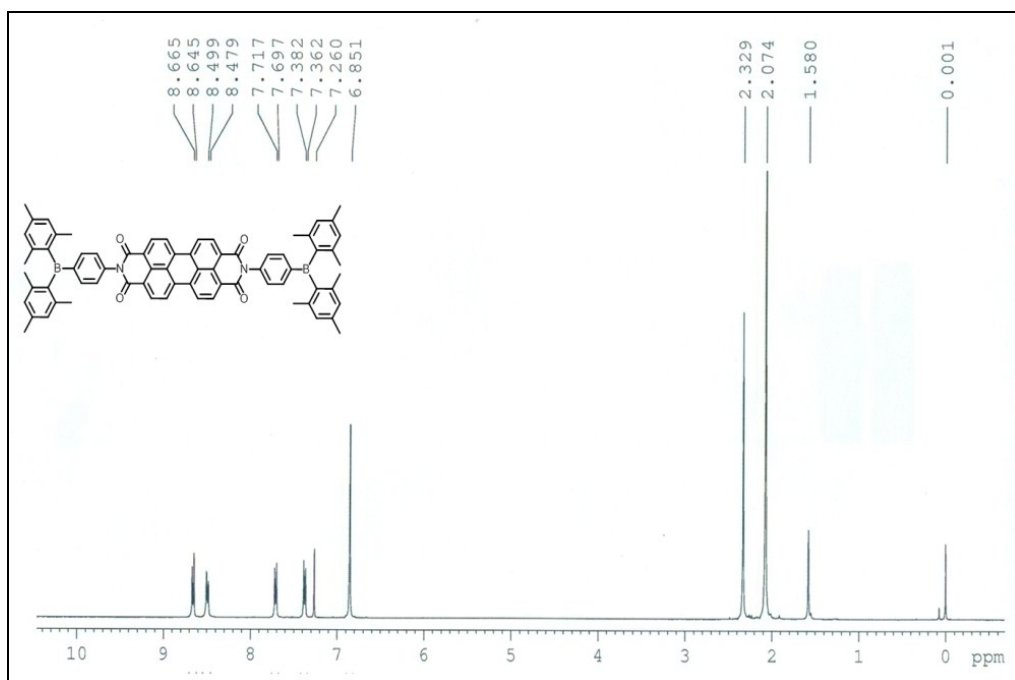

**Figure S1.**  $^1\text{H}$  NMR spectra of PDI-TAB

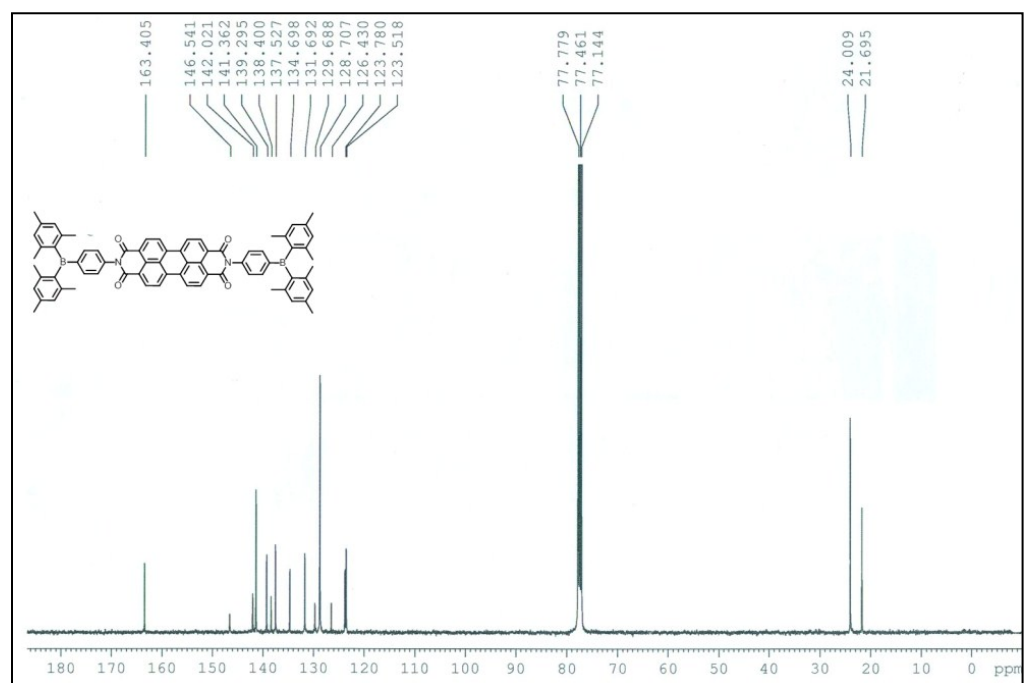

**Figure S2.**  $^{13}\text{C}$  NMR spectra of PDI-TAB

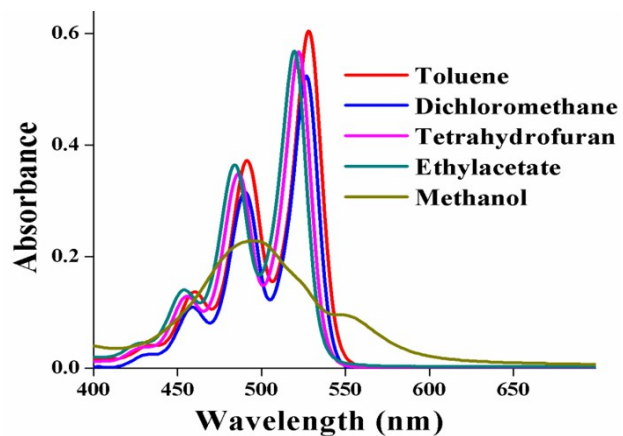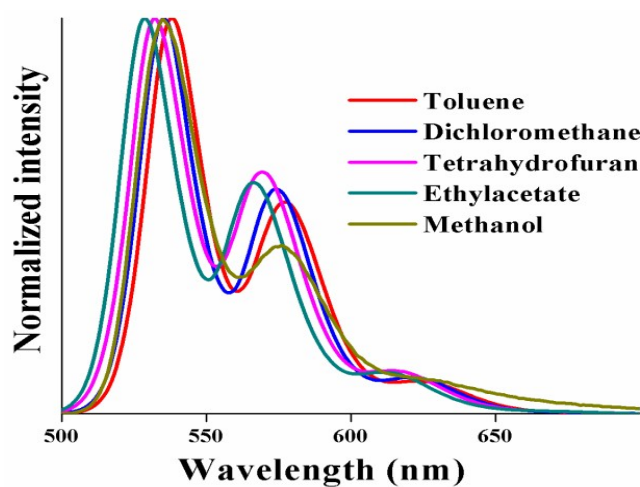

**Figure S3.** Absorption (top) and emission (bottom) spectra of PDI-TAB in solvents of different polarity (Concentration = 10  $\mu$ M,  $\lambda_{\text{ex}}$  = 490 nm)

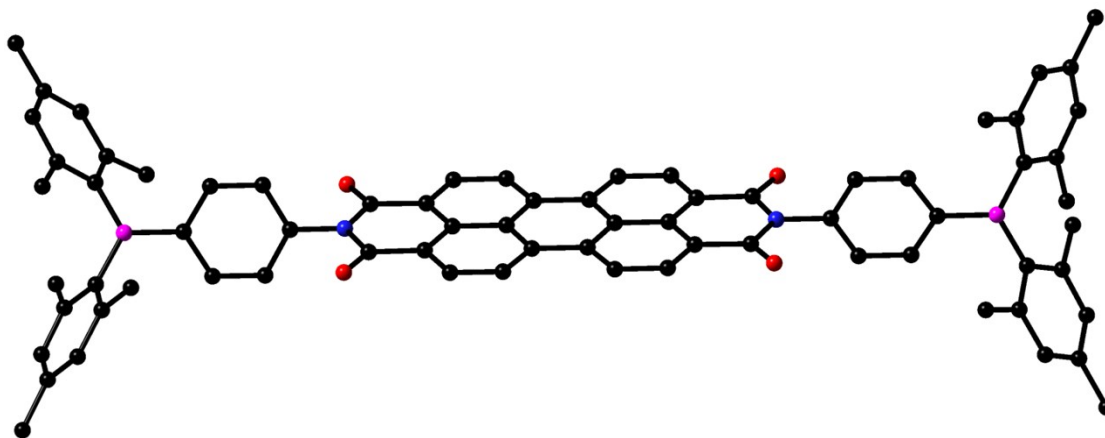

**Figure S4.** Ground state DFT optimized structure **PDI-TAB** (Atom color codes: C- black, N - Blue, B-Magenta, O - Red and hydrogen atoms are omitted for clarity)

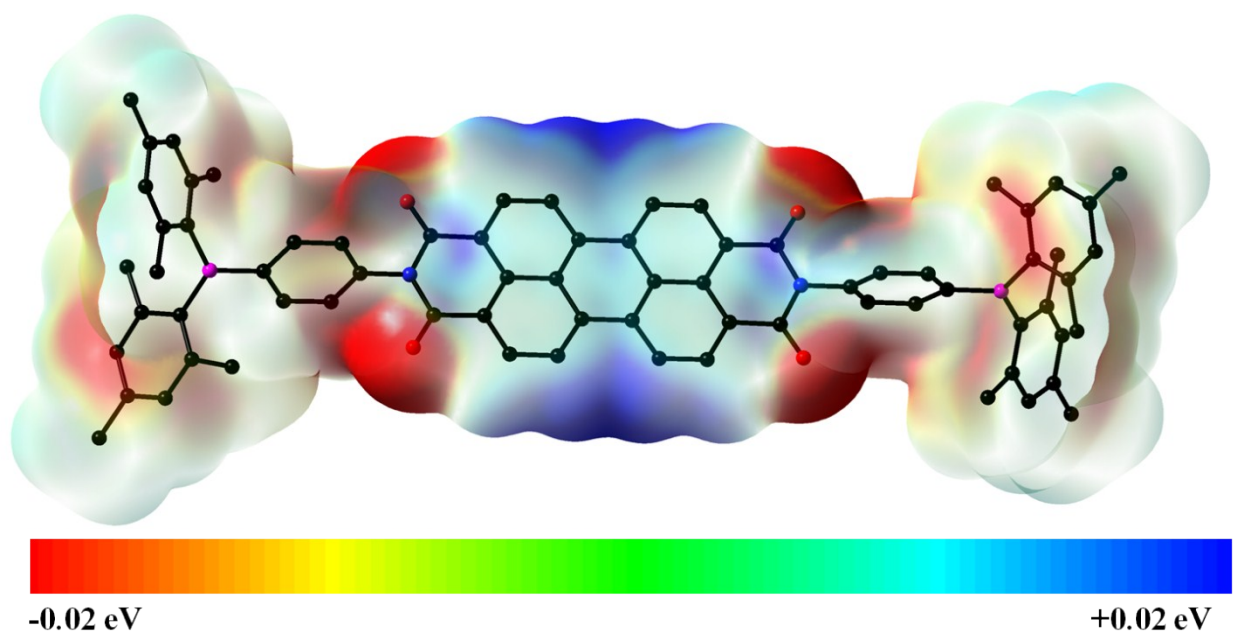

**Figure S5.** ESP surface diagram of PDI-TAB (Atom color codes: C- black, N - Blue, B-Magenta, O - Red and hydrogen atoms are omitted for clarity)

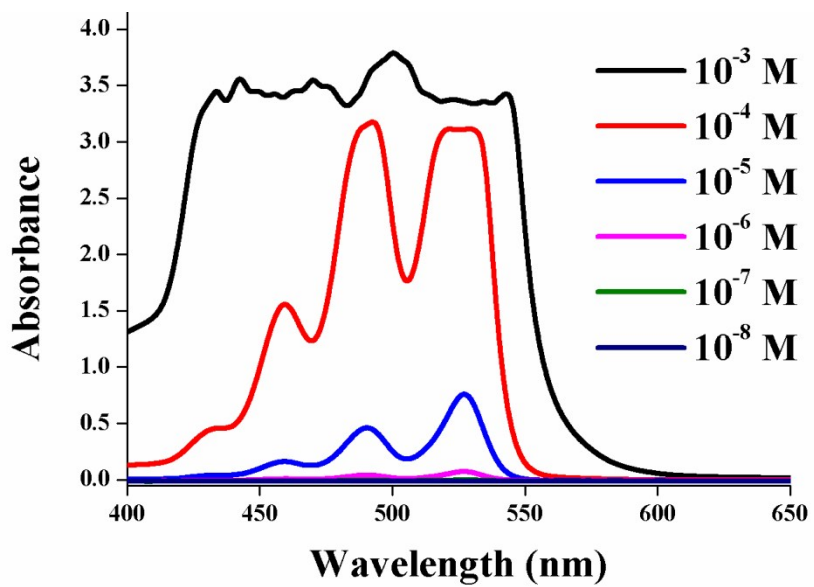

**Figure S6.** UV-Vis absorption spectra of PDI-TAB at different concentrations

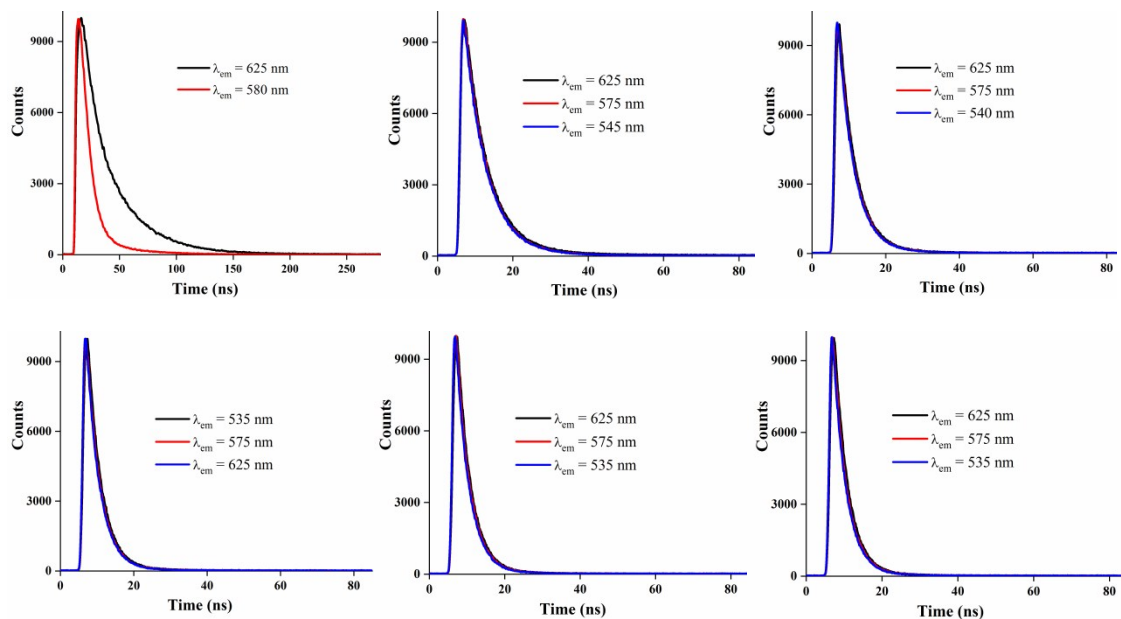

**Figure S7.** Time resolved emission decay profiles for **PDI-TAB** at different concentrations, 10<sup>-3</sup> M (top left), 10<sup>-4</sup> M (top middle), 10<sup>-5</sup> M (top right), 10<sup>-6</sup> M (bottom left), 10<sup>-7</sup> M (bottom middle) and 10<sup>-8</sup> M (bottom right); (λ<sub>ex</sub> = 450 nano-LED was used for TRF measurements and the corresponding emission wavelengths are shown in the graphs)

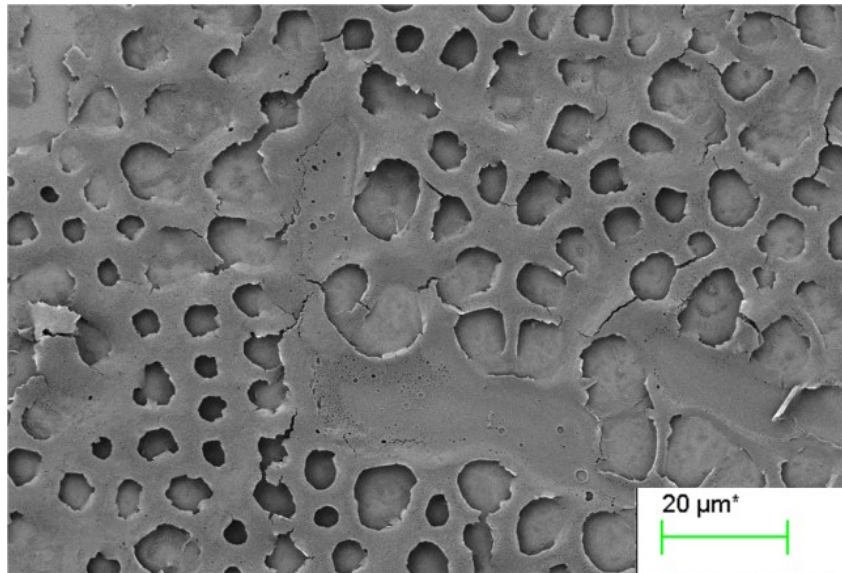

**Figure S8.** SEM image of thin films of **PDI-TAB**. Drop casted using 10<sup>-3</sup> M solution in dichloromethane



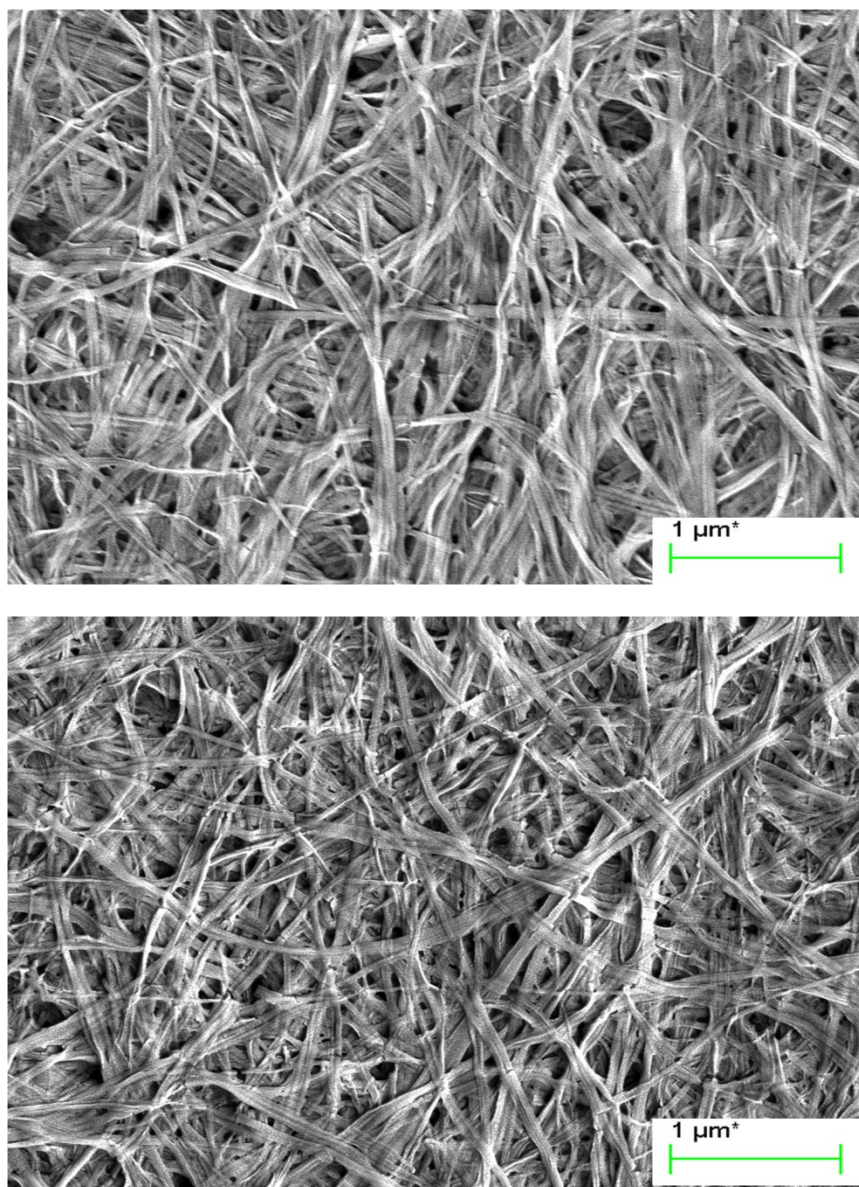

**Figure S9.** SEM images of self-assemblies of **PDI-TAB** formed by injecting  $10^{-4}$  M (top)  $10^{-5}$  M (bottom) dichloromethane solution to MeOH solvent.

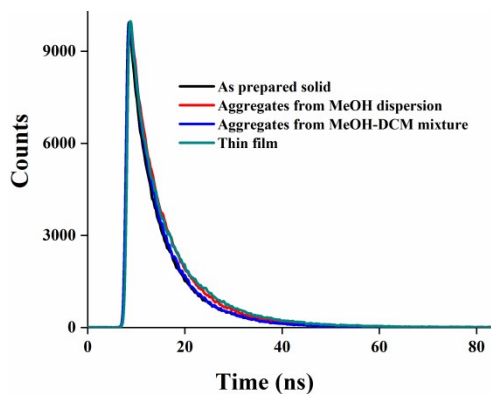

**Figure S10.** Time resolved emission decay profiles of **PDI-TAB** in the solid state ( $\lambda_{\text{ex}} = 450$  nano-LED was used for TRF measurements)

**Table S1.** Photophysical data of **PDI-TAB** in solid state ( $\lambda_{\text{em}} = 460$  nm for emission spectral measurements and 450 nano-LED was used for TRF measurements)

|                                                                                       | $\lambda_{\text{em}}$ (nm) | $\tau$ / ns (A, %)                              | $\chi^2$ |
|---------------------------------------------------------------------------------------|----------------------------|-------------------------------------------------|----------|
| As prepared solid of PDI-TAB                                                          | 688                        | $\tau_1 = 5.02$ (57%)<br>$\tau_2 = 10.29$ (43%) | 1.2      |
| Self-assembly formed by dispersing PDI-TAB in MeOH solvent                            | 694                        | $\tau_1 = 4.80$ (60%)<br>$\tau_2 = 10.01$ (40%) | 1.3      |
| Self-assembly formed by injecting $10^{-3}$ M DCM solution of PDI-TAB to MeOH solvent | 694                        | $\tau_1 = 4.61$ (45%)<br>$\tau_2 = 8.88$ (55%)  | 1.2      |
| Thin film (by drop casting $10^{-3}$ M DCM solution of PDI-TAB)                       | 675                        | $\tau_1 = 4.60$ (32%)<br>$\tau_2 = 10.55$ (68%) | 1.3      |

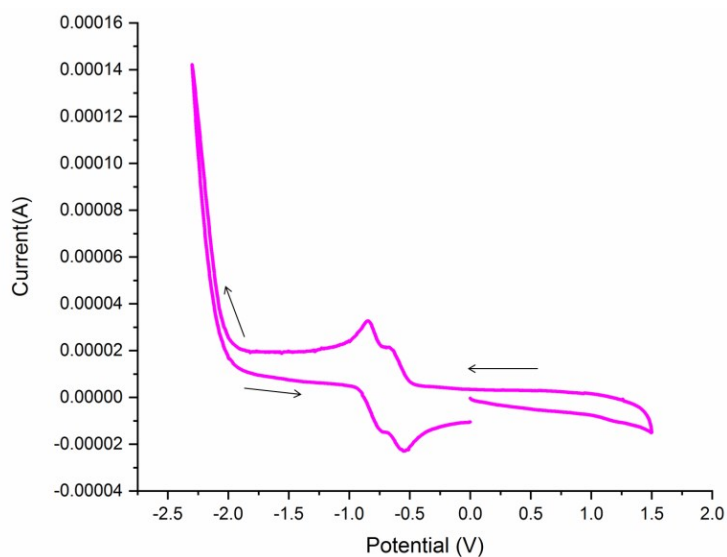

**Figure S11.** Cyclic voltammogram traces of **PDI-TAB** in DCM with 0.1 M TBAFPF<sub>6</sub> as supporting electrolyte. At scan rate of 100 mV/s. Glassy carbon, platinum and calomel were used as working electrode, counter electrode and reference electrode, respectively.

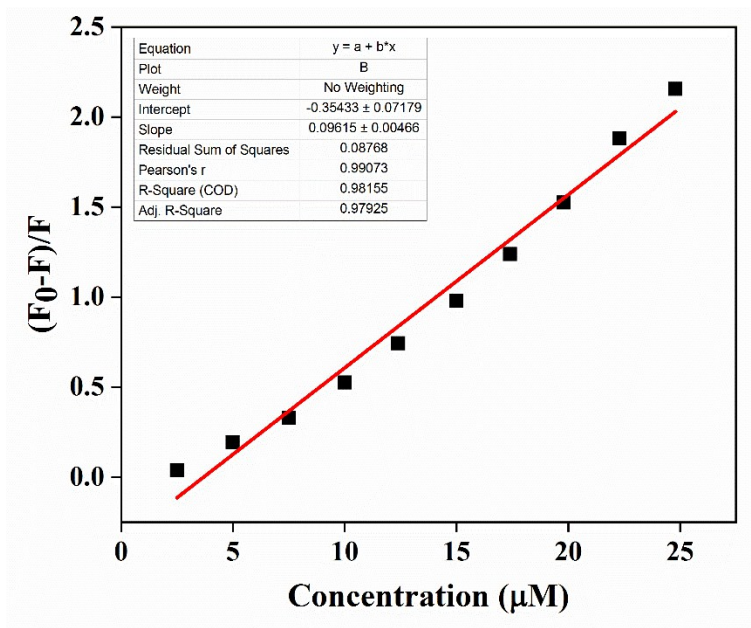

**Figure S12.** Plot of concentration of TBAF versus relative fluorescence intensity changes of **PDI-TAB**  $\{(F_0-F)/F\}$ , up on addition of increasing concentrations of TBAF.

$$F_0/F = 1 + K_{SV}[Q],$$

Where,  $F_0$  and  $F$  are the steady-state fluorescence intensities in the absence and presence of the TBAF, respectively.  $[Q]$  is the concentration of quencher and  $K_{SV}$  is the Stern-Volhmer constant.

**Table S2.** Photophysical data of PDI-TAB and PDI-TAB++2F<sup>-</sup> (PDI-TAB after addition of 5 equivalents of fluoride) in dichloromethane solution ( $\lambda_{ex} = 490$  nm for emission spectral measurements and 450 nano-LED was used for TRF measurements)

|                          | $\phi_F$ (%) | $\tau$ (ns) | $k_r * 10^6$ (s <sup>-1</sup> ) | $k_{nr} * 10^6$ (s <sup>-1</sup> ) |
|--------------------------|--------------|-------------|---------------------------------|------------------------------------|
| PDI-TAB                  | 89.0         | 4.72        | 188.70                          | 23.32                              |
| PDI-TAB++2F <sup>-</sup> | 11.3         | 4.37        | 25.86                           | 202.97                             |

Following equations have been used for the calculation of  $k_r$  and  $k_{nr}$ ;  $\{\phi_F = k_r / (k_r + k_{nr})\}$  and  $\{\tau = 1 / (k_r + k_{nr})\}$ , where  $\phi_F$  is the fluorescence quantum yield,  $\tau$  is the average life time and  $k_r$  and  $k_{nr}$  are the radiative and non-radiative decay rate constants, respectively.<sup>1</sup>



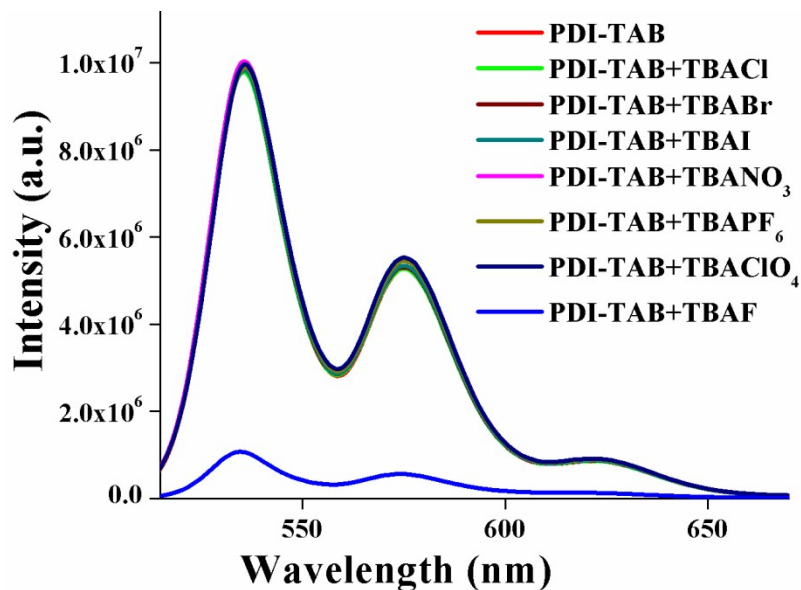

**Figure S13.** Luminescence changes associated with PDI-TAB (Concentration of PDI-TAB = 10  $\mu$ M,  $\lambda_{\text{ex}}$  = 460 nm) in the presence of various interfering anions (used as their tetrabutylammonium (TBA) salts, 2  $\mu$ L = 0.5 equivalents).

**Table S3.** Optimized geometry coordinates of PDI-TAB at ground state

|   |             |             |             |
|---|-------------|-------------|-------------|
| C | 1.48357557  | -1.65085071 | -1.71743840 |
| C | 2.88173271  | -1.63997185 | -1.71069995 |
| H | 3.43873548  | -2.28261830 | -2.38352682 |
| C | 3.57511183  | -0.81020133 | -0.84520197 |
| C | 3.56968201  | 0.88789168  | 0.92255557  |
| C | 2.87009365  | 1.71572752  | 1.78498661  |
| H | 3.42224228  | 2.36018678  | 2.46011063  |
| C | 1.47168112  | 1.72259339  | 1.78605543  |
| H | 0.97208291  | 2.38673436  | 2.48029715  |
| C | 0.73770666  | -0.83589308 | -0.86326234 |
| C | 1.43239595  | 0.03583269  | 0.03435385  |
| C | 2.86189494  | 0.03786964  | 0.03732099  |
| C | 0.73133672  | 0.90553141  | 0.92901184  |
| C | 5.05406554  | -0.82322788 | -0.86072321 |
| O | 5.70592031  | -1.53808778 | -1.61107477 |
| N | 5.70033913  | 0.04104313  | 0.04327960  |
| C | 5.04897193  | 0.90479742  | 0.94359535  |
| O | 5.69662505  | 1.62218754  | 1.69524575  |
| C | -1.48555555 | 1.74945654  | 1.74881996  |
| C | -2.88387863 | 1.74197587  | 1.73812958  |
| H | -3.44094007 | 2.40110275  | 2.39478204  |
| C | -3.57717877 | 0.89335864  | 0.89092064  |
| C | -3.57022892 | -0.83836365 | -0.84350302 |
| C | -2.87059282 | -1.68445590 | -1.68796956 |
| H | -3.42269388 | -2.34545154 | -2.34691638 |
| C | -1.47236263 | -1.68702421 | -1.69272694 |
| H | -0.97252429 | -2.36867828 | -2.36956798 |
| C | -0.73905925 | 0.91150111  | 0.91769608  |
| C | -1.43363403 | 0.03129435  | 0.02827060  |
| C | -2.86311988 | 0.02877686  | 0.02523308  |

|   |              |             |             |
|---|--------------|-------------|-------------|
| C | -0.73250118  | -0.84655605 | -0.85823944 |
| C | -5.05644462  | 0.90468423  | 0.90716036  |
| O | -5.70839929  | 1.63196093  | 1.64539638  |
| N | -5.70235075  | 0.02291162  | 0.01963020  |
| C | -5.04912504  | -0.85568756 | -0.86580932 |
| O | -5.69492290  | -1.58543616 | -1.60701135 |
| C | 7.14768939   | 0.04075746  | 0.04333868  |
| C | 7.83817283   | -0.92098562 | 0.78100643  |
| C | 7.83887669   | 0.99646364  | -0.70178675 |
| C | 9.23086072   | -0.93347199 | 0.75259549  |
| H | 7.28537004   | -1.65612550 | 1.35825197  |
| C | 9.23189336   | 0.98955731  | -0.69616286 |
| H | 7.28679369   | 1.73644193  | -1.27347815 |
| C | 9.96721981   | 0.02161862  | 0.02034147  |
| H | 9.76225993   | -1.69886381 | 1.31072172  |
| H | 9.76520898   | 1.74294126  | -1.26918224 |
| C | -7.14942276  | 0.01818308  | 0.01647895  |
| C | -7.84265142  | 1.01079823  | -0.67663337 |
| C | -7.83830211  | -0.98111759 | 0.70435958  |
| C | -9.23551378  | 1.00542877  | -0.66598510 |
| H | -7.29197809  | 1.77989191  | -1.20981736 |
| C | -9.23086395  | -0.99161538 | 0.67980288  |
| H | -7.28422792  | -1.74438296 | 1.24237434  |
| C | -9.96936980  | 0.00205094  | 0.00226085  |
| H | -9.76973652  | 1.79070078  | -1.19283515 |
| H | -9.76125629  | -1.78327027 | 1.20092044  |
| B | 11.54235039  | -0.00516742 | -0.01614174 |
| B | -11.54656613 | -0.01082561 | -0.01104399 |
| C | -12.31663677 | 1.34786487  | -0.27921943 |
| C | -13.20137123 | 1.46765212  | -1.39078140 |
| C | -12.12566755 | 2.49305233  | 0.53620475  |
| C | -13.83126493 | 2.68349955  | -1.66084347 |
| C | -12.78979008 | 3.69252422  | 0.23805574  |
| C | -13.64384480 | 3.81410470  | -0.85541255 |
| H | -14.48710907 | 2.75433473  | -2.52702294 |
| H | -12.63125979 | 4.55337705  | 0.88592091  |
| C | -12.29663239 | -1.38382969 | 0.24120655  |
| C | -13.20200820 | -1.52172978 | 1.33393695  |
| C | -12.06881142 | -2.52359148 | -0.57202922 |
| C | -13.81599907 | -2.74879558 | 1.58869734  |
| C | -12.71798078 | -3.73525092 | -0.29002866 |
| C | -13.59166840 | -3.87446987 | 0.78548608  |
| H | -14.48887895 | -2.83251646 | 2.44060921  |
| H | -12.53171975 | -4.59135063 | -0.93685382 |
| C | 12.32362969  | 1.33723183  | -0.32500129 |
| C | 12.11175141  | 2.50967140  | 0.44918118  |
| C | 13.25165254  | 1.41272093  | -1.40065022 |
| C | 12.81495230  | 3.68458000  | 0.15590916  |
| C | 13.91073730  | 2.61413221  | -1.67879630 |
| C | 13.71611956  | 3.76365148  | -0.90715562 |
| H | 12.65063493  | 4.56360718  | 0.77719413  |
| H | 14.60135245  | 2.65224143  | -2.51940661 |
| C | 12.28171970  | -1.37870114 | 0.26402284  |
| C | 12.02704495  | -2.53362241 | -0.51978469 |
| C | 13.20500599  | -1.50306408 | 1.34330453  |
| C | 12.66392744  | -3.74722729 | -0.22050370 |
| C | 13.80703401  | -2.73276388 | 1.61567164  |

|   |              |             |             |
|---|--------------|-------------|-------------|
| C | 13.55159529  | -3.87424954 | 0.84534278  |
| H | 12.45851549  | -4.61417225 | -0.84680838 |
| H | 14.49693631  | -2.80517631 | 2.45488917  |
| C | -11.20141186 | -2.49459095 | -1.81634955 |
| H | -10.55592791 | -3.37927071 | -1.86453398 |
| H | -11.82582842 | -2.50692790 | -2.71953544 |
| H | -10.56215034 | -1.61262460 | -1.87290855 |
| C | -13.50138568 | -0.37290588 | 2.27684440  |
| H | -12.59761994 | -0.01164550 | 2.78237250  |
| H | -13.93636297 | 0.48267527  | 1.75013784  |
| H | -14.20675652 | -0.68494307 | 3.05333523  |
| C | -14.27975572 | -5.18625523 | 1.08133119  |
| H | -14.04880573 | -5.53898442 | 2.09418648  |
| H | -15.37088349 | -5.08652087 | 1.02065597  |
| H | -13.97495375 | -5.96559436 | 0.37597151  |
| C | -13.46140613 | 0.31224266  | -2.33736080 |
| H | -12.54129643 | -0.03579049 | -2.82216108 |
| H | -13.89417305 | -0.54901781 | -1.81816518 |
| H | -14.15450196 | 0.61131968  | -3.12984991 |
| C | -11.28499213 | 2.47957940  | 1.79880799  |
| H | -10.68288822 | 3.39200245  | 1.87809228  |
| H | -11.92832206 | 2.44467500  | 2.68813062  |
| H | -10.60709845 | 1.62664494  | 1.85293639  |
| C | -14.35295395 | 5.11155277  | -1.16460163 |
| H | -15.43991948 | 5.00756088  | -1.05293159 |
| H | -14.02493026 | 5.91523013  | -0.49797807 |
| H | -14.16876704 | 5.43178718  | -2.19732438 |
| C | 11.15082908  | 2.55794680  | 1.62444348  |
| H | 10.13589421  | 2.82006015  | 1.30194716  |
| H | 11.07647687  | 1.60515455  | 2.15506633  |
| H | 11.46916454  | 3.31713889  | 2.34667316  |
| C | 13.53883095  | 0.22713211  | -2.30143221 |
| H | 14.23598213  | 0.50777568  | -3.09715425 |
| H | 13.98052710  | -0.60648507 | -1.74578256 |
| H | 12.63042036  | -0.15494409 | -2.78182088 |
| C | 14.47801246  | 5.03549983  | -1.19619598 |
| H | 13.94155484  | 5.91636966  | -0.82826151 |
| H | 15.46265484  | 5.02691505  | -0.70947656 |
| H | 14.65134065  | 5.16342452  | -2.27024786 |
| C | 13.53917063  | -0.33844284 | 2.25465783  |
| H | 13.92128587  | 0.52145431  | 1.69606386  |
| H | 12.66119297  | 0.00756532  | 2.81447167  |
| H | 14.29695319  | -0.62857869 | 2.98916097  |
| C | 11.14636933  | -2.51876485 | -1.75520507 |
| H | 10.52915852  | -1.62271764 | -1.83166066 |
| H | 11.76066971  | -2.57404784 | -2.66376804 |
| H | 10.47771652  | -3.38734042 | -1.77104523 |
| C | 14.21176957  | -5.19302068 | 1.17207282  |
| H | 15.29311222  | -5.07545677 | 1.31073133  |
| H | 13.81533331  | -5.61619249 | 2.10436873  |
| H | 14.04930289  | -5.92943473 | 0.37880654  |
| H | 0.98857879   | -2.31632385 | -2.41362088 |
| H | -0.99093051  | 2.43288119  | 2.42770931  |

**Table S4.** Optimized geometry coordinates of PDI-TAB+2F<sup>-</sup> at ground state

---

|   |             |             |             |
|---|-------------|-------------|-------------|
| C | 1.40334567  | 2.34272645  | 0.93609033  |
| C | 2.80012786  | 2.34226760  | 1.00988342  |
| H | 3.32982319  | 3.20395190  | 1.40086546  |
| C | 3.52778051  | 1.24232494  | 0.58738321  |
| C | 3.59463918  | -1.01569872 | -0.35448638 |
| C | 2.93272867  | -2.12161790 | -0.86110689 |
| H | 3.51312256  | -2.97840895 | -1.18520848 |
| C | 1.53716369  | -2.13516265 | -0.95409532 |
| H | 1.06724194  | -3.02382287 | -1.35698523 |
| C | 0.69227843  | 1.24935899  | 0.43710067  |
| C | 1.42299654  | 0.10354014  | -0.01181077 |
| C | 2.85001193  | 0.11029133  | 0.07323480  |
| C | 0.76146468  | -1.04947949 | -0.54217280 |
| C | 5.00662136  | 1.27043907  | 0.68021214  |
| O | 5.61659831  | 2.23951425  | 1.11502986  |
| N | 5.69244412  | 0.12292068  | 0.24458088  |
| C | 5.07362442  | -1.03348880 | -0.26174544 |
| O | 5.73929848  | -2.00257301 | -0.60551153 |
| C | -1.41622176 | -2.13938009 | -1.15255446 |
| C | -2.81309070 | -2.13943747 | -1.22502779 |
| H | -3.34221211 | -2.99486600 | -1.63023399 |
| C | -3.54194487 | -1.04974735 | -0.77882065 |
| C | -3.61085877 | 1.19146487  | 0.20219938  |
| C | -2.94948419 | 2.29285888  | 0.71925439  |
| H | -3.53105636 | 3.14021126  | 1.06528197  |
| C | -1.55302509 | 2.31327611  | 0.79596103  |
| H | -1.08349643 | 3.19745656  | 1.20898548  |
| C | -0.70617144 | -1.05472333 | -0.63354989 |
| C | -1.43744449 | 0.08651982  | -0.17400012 |
| C | -2.86491937 | 0.07618295  | -0.25053908 |
| C | -0.77616390 | 1.23741121  | 0.36118129  |
| C | -5.02138202 | -1.08303069 | -0.85996504 |
| O | -5.63052213 | -2.04561177 | -1.31008127 |
| N | -5.70888190 | 0.04994764  | -0.39052738 |
| C | -5.09135499 | 1.19816246  | 0.13565256  |
| O | -5.75920999 | 2.15063584  | 0.51942686  |
| C | 7.14021963  | 0.12367165  | 0.34142646  |
| C | 7.91563237  | 0.49480083  | -0.75589130 |
| C | 7.75672875  | -0.23749886 | 1.53915252  |
| C | 9.30836503  | 0.48414397  | -0.64845763 |
| H | 7.42935044  | 0.79295425  | -1.68175837 |
| C | 9.14968879  | -0.23578166 | 1.62127613  |
| H | 7.14609837  | -0.51040628 | 2.39680288  |
| C | 9.97545211  | 0.10081930  | 0.52989362  |
| H | 9.89370761  | 0.79252750  | -1.51231935 |
| H | 9.62028231  | -0.49963987 | 2.56479404  |
| C | -7.15872914 | 0.03165434  | -0.44559230 |
| C | -7.88726952 | -0.52010757 | 0.60761932  |
| C | -7.82476967 | 0.55679889  | -1.55224844 |
| C | -9.28178482 | -0.52900570 | 0.54847532  |
| H | -7.36212249 | -0.94442510 | 1.46016211  |
| C | -9.22061961 | 0.53831879  | -1.58523175 |
| H | -7.25140940 | 0.97161465  | -2.37816217 |
| C | -9.99925821 | 0.01673992  | -0.53291301 |
| H | -9.82892420 | -0.98309219 | 1.37197767  |

|   |              |             |             |
|---|--------------|-------------|-------------|
| H | -9.73103498  | 0.93442235  | -2.45910635 |
| B | 11.61630730  | 0.10703671  | 0.72899358  |
| B | -11.64626096 | -0.00837219 | -0.66625093 |
| C | -12.16611373 | -1.46358712 | -0.02994155 |
| C | -12.64144132 | -1.63043277 | 1.29984750  |
| C | -12.06710419 | -2.65652572 | -0.80657678 |
| C | -13.03711959 | -2.88929247 | 1.78350060  |
| C | -12.47593251 | -3.89575633 | -0.29348540 |
| C | -12.98147692 | -4.04014872 | 0.99962231  |
| H | -13.39475752 | -2.96759422 | 2.81048927  |
| H | -12.38343709 | -4.78028575 | -0.92450824 |
| C | -12.48783768 | 1.34024033  | -0.13584329 |
| C | -13.87325208 | 1.42328578  | -0.48080256 |
| C | -11.96049752 | 2.46443495  | 0.55436584  |
| C | -14.64746983 | 2.54189394  | -0.14901943 |
| C | -12.76762962 | 3.57433236  | 0.86766014  |
| C | -14.11564167 | 3.64159541  | 0.52883780  |
| H | -15.70083090 | 2.55386162  | -0.43102592 |
| H | -12.31844016 | 4.41369547  | 1.39835564  |
| C | 12.40740734  | -1.36259903 | 0.59284678  |
| C | 11.86922323  | -2.58827507 | 0.11252626  |
| C | 13.74640713  | -1.42819024 | 1.08469857  |
| C | 12.62590066  | -3.77331672 | 0.12811280  |
| C | 14.47444374  | -2.62589427 | 1.07756463  |
| C | 13.93455589  | -3.82218242 | 0.60305508  |
| H | 12.17057575  | -4.68906975 | -0.24934311 |
| H | 15.49602587  | -2.62198260 | 1.45896576  |
| C | 12.24584048  | 1.33738967  | -0.21210045 |
| C | 12.20944097  | 2.68595538  | 0.25520230  |
| C | 12.77390307  | 1.15192647  | -1.51889338 |
| C | 12.72036705  | 3.73829349  | -0.51738669 |
| C | 13.27240603  | 2.23151310  | -2.26846891 |
| C | 13.26853668  | 3.53820217  | -1.78600360 |
| H | 12.67822771  | 4.75130110  | -0.11583079 |
| H | 13.67212276  | 2.03814265  | -3.26428909 |
| C | -10.51963630 | 2.56719999  | 1.02644442  |
| H | -9.80465216  | 2.55291171  | 0.19880836  |
| H | -10.36912061 | 3.49994694  | 1.58241761  |
| H | -10.23590035 | 1.74016490  | 1.68530506  |
| C | -14.59822729 | 0.30654749  | -1.21253398 |
| H | -14.11887451 | 0.08740797  | -2.16833639 |
| H | -14.58000232 | -0.62654186 | -0.63910532 |
| H | -15.64587447 | 0.57542994  | -1.39115076 |
| C | -14.96689788 | 4.84205073  | 0.87627201  |
| H | -15.38704986 | 5.31602511  | -0.02081809 |
| H | -15.81720222 | 4.56619841  | 1.51419324  |
| H | -14.38518662 | 5.60151364  | 1.41009727  |
| C | -12.75346497 | -0.48248497 | 2.29012229  |
| H | -11.86457636 | 0.15398349  | 2.29391353  |
| H | -13.60233963 | 0.17270673  | 2.06618217  |
| H | -12.89195172 | -0.87060881 | 3.30644502  |
| C | -11.49242543 | -2.67975291 | -2.21376560 |
| H | -11.35314904 | -3.71485562 | -2.54812349 |
| H | -12.13799553 | -2.16925082 | -2.93308477 |
| H | -10.52375176 | -2.17291377 | -2.26177239 |
| C | -13.44866957 | -5.38028638 | 1.52111205  |
| H | -14.49254028 | -5.58359538 | 1.24267113  |

|   |              |             |             |
|---|--------------|-------------|-------------|
| H | -12.84578682 | -6.20219200 | 1.11701961  |
| H | -13.39322899 | -5.42709931 | 2.61473704  |
| C | 10.46772221  | -2.72815350 | -0.45881818 |
| H | 9.69144120   | -2.56238429 | 0.29454202  |
| H | 10.26789218  | -2.01197079 | -1.26158991 |
| H | 10.32512445  | -3.73479505 | -0.86882243 |
| C | 14.47039744  | -0.21855918 | 1.65211288  |
| H | 15.54012824  | -0.42977243 | 1.76851114  |
| H | 14.36052611  | 0.65834593  | 1.00824940  |
| H | 14.06528103  | 0.06490540  | 2.62750076  |
| C | 14.74232167  | -5.10035718 | 0.57737092  |
| H | 14.09450389  | -5.98436190 | 0.57645144  |
| H | 15.37574536  | -5.16384481 | -0.31888868 |
| H | 15.41005901  | -5.17254912 | 1.44414040  |
| C | 12.83513919  | -0.20449093 | -2.20115384 |
| H | 13.61178512  | -0.84773526 | -1.77461159 |
| H | 11.89486388  | -0.75466567 | -2.11186128 |
| H | 13.05108293  | -0.08322857 | -3.26945967 |
| C | 11.60629532  | 3.08030090  | 1.59360998  |
| H | 10.60927659  | 2.65089066  | 1.72968454  |
| H | 12.20644175  | 2.72606847  | 2.43586657  |
| H | 11.52159955  | 4.17148189  | 1.66344436  |
| C | 13.79111477  | 4.69315055  | -2.61066280 |
| H | 14.43104406  | 4.34340042  | -3.42842059 |
| H | 12.97418332  | 5.27336947  | -3.06228302 |
| H | 14.37635867  | 5.39252503  | -2.00107423 |
| H | 0.88045702   | 3.22629367  | 1.28078440  |
| H | -0.89246431  | -3.01562958 | -1.51413554 |
| F | -11.89270378 | 0.00426275  | -2.11526100 |
| F | 11.80056402  | 0.44383975  | 2.14530182  |

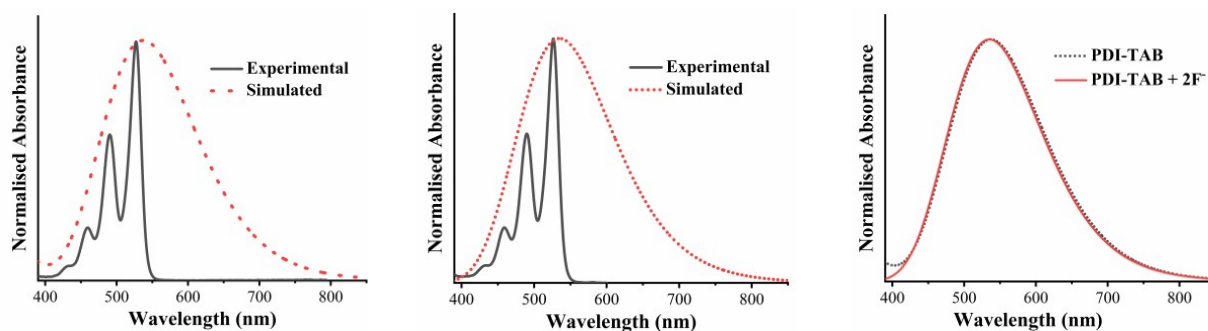

**Figure S14.** Experimental and simulated absorption spectra of **PDI-TAB**, before (left) and after addition of fluoride anion (middle). Comparison of simulated absorption spectra PDI-TAB before and after complexation of fluoride anion (right).



**Table S5.** Summary of dominant electronic transitions of **PDI-TAB** and **PDI-TAB+2F<sup>-</sup>** obtained from TD-DFT calculations

| Compound                | Excited State | E/eV   | E/nm   | f      | Dominant transitions (percentage contribution)                                           |
|-------------------------|---------------|--------|--------|--------|------------------------------------------------------------------------------------------|
| PDI-TAB                 | 1             | 2.3075 | 537.30 | 1.1289 | HOMO ->LUMO (100%)                                                                       |
|                         | 2             | 2.5059 | 494.78 | 0.0000 | HOMO-1 ->LUMO (100%)                                                                     |
|                         | 3             | 2.5204 | 491.93 | 0.0000 | HOMO-2 ->LUMO (100%)                                                                     |
|                         | 19            | 3.5369 | 350.55 | 0.1121 | HOMO-1 ->LUMO+2 (95%)                                                                    |
|                         | 20            | 3.5571 | 348.56 | 0.0662 | HOMO-15 ->LUMO (5%)<br>HOMO-13 ->LUMO (79%)<br>HOMO-13 ->LUMO (5%)<br>HOMO ->LUMO+6 (5%) |
| PDI-TAB+2F <sup>-</sup> | 1             | 1.6949 | 731.50 | 0.0000 | HOMO ->LUMO (99%)                                                                        |
|                         | 2             | 1.7068 | 726.43 | 0.0000 | HOMO-1 ->LUMO (99%)                                                                      |
|                         | 3             | 1.8351 | 675.61 | 0.0001 | HOMO-2 ->LUMO (100%)                                                                     |
|                         | 4             | 1.8363 | 675.20 | 0.0001 | HOMO-3 ->LUMO (100%)                                                                     |
|                         | 11            | 2.3165 | 535.21 | 1.0746 | HOMO-10 ->LUMO (100%)                                                                    |
|                         | 13            | 2.6327 | 470.95 | 0.0066 | HOMO-12 ->LUMO (98%)                                                                     |

## Reference

1. B. Kupcewicz and M. Małecka, *Cryst. Growth Des.*, 2015, **15**, 3893-3904.
